1 In-hospital stay of anemic patients (70-90 g.L<sup>-1</sup>) in the ED with/without transfusion: a single-  
2 center propensity-matched study.

3 Running head: Impact of red blood cell transfusion in the emergency department on length of  
4 stay

5

6 Authors: Fabien COISY<sup>a</sup>, Clémence ANSELME<sup>b</sup>, Radjiv GOULABCHAND<sup>c</sup>, Laura GRAU-  
7 MERCIER<sup>b</sup>, Thibaut MARKARIAN<sup>d</sup>, Xavier BOBBIA<sup>e</sup>, Romain GENRE-GRANDPIERRE<sup>a</sup>

8

9 a. UR UM 103 (IMAGINE), Department of Emergency Medicine, CHU Nîmes, University of  
10 Montpellier, Nîmes, France

11 b. Department of Emergency Medicine, CHU Nîmes, University of Montpellier, Nîmes,  
12 France

13 c. IDESP, INSERM, Department of Internal Medicine, CHU Nîmes, University of  
14 Montpellier, Nîmes, France

15 d. Department of Emergency Medicine, Timone University Hospital, Marseille, France

16 e. UR UM 103 (IMAGINE), Department of Emergency Medicine, Montpellier University  
17 Hospital, Montpellier University, Montpellier, France

18

19 Corresponding author:

20 Dr Fabien Coisy

21 Postal address: 4 rue du Pr Robert Debré, 30900 Nîmes Cedex 2

22 E-mail address: [fabien.coisy@gmail.com](mailto:fabien.coisy@gmail.com)

23 Tel: +33 6 12 19 43 69

24

25 **Conflicts of Interest and Source of Funding**

1 The authors declare no conflicts of interest. No funding was granted for this study.

2

1 **Abstract**

2 **Background and importance**

3 A quarter of patients presenting to the emergency department (ED) have anemia. Although red  
4 blood cell (RBC) transfusion is routinely used in symptomatic anemia, there is no evidence on  
5 the benefit of blood transfusion in hemodynamically stable patients in the ED for patients  
6 requiring hospitalization.

7 **Objective**

8 The study aimed to compare in-hospital length of stay (LOS) of patients with anemia between  
9 70 and 90 g.L<sup>-1</sup> transfused or not in ED.

10 **Design**

11 Retrospective single-center study

12 **Settings and participants**

13 All adult patients admitted to the ED of our university hospital with an initial hemoglobin  
14 level between 70 and 90 g.L<sup>-1</sup>, without hemorrhagic shock, who were hospitalized after ED  
15 admission.

16 **Outcome measures and analysis**

17 A propensity score, comprising hemoglobin level, Charlson's comorbidity index, clinical  
18 signs of anemia, the chronicity of anemia and hospitalization department was used to compare  
19 the LOS of patients transfused versus non-transfused in the ED.

20 **Intervention**

21 RBC transfusion in the ED

22 **Main results**

23 From January 1st to December 31st, 2022, 1 169 patients were screened of whom 569 (49%)  
24 were excluded, mostly due to discharge without hospitalization. The remaining 564 (48%)  
25 patients had a median age of 77 [68; 85] and 240 (43%) were women. Finally, 127 (23%)  
26 patients were transfused in ED. Transfused patients received more units of RBC during the  
27 whole hospitalization period (4 [3; 5] versus 2 [1; 3] than non-transfused patients (p< 0.01)).  
28 After propensity score matching, median LOS was 9 [5; 19] days for ED transfused patients  
29 and 8 [5; 15] days for non-ED transfused patients (median difference= -1 95% CI [-3; 2]; p=  
30 0.45).

31

32 **Conclusion**

1 In patients with non-life-threatening anemia, RBC transfusion in the ED does not appear to  
2 reduce in-hospital LOS compared with transfusion in inpatient departments. Further studies  
3 are needed to identify patients requiring transfusion in ED.

4

5 **Keywords :**

6 Blood transfusion, Length of stay, Anemia, Emergency Department, Hospital

7

## 1 **Introduction**

2 Anemia, defined by World Health Organization as a hemoglobin level under 120 g.L<sup>-1</sup> for  
3 women and 130 g.L<sup>-1</sup> for men, is a worldwide concern [1]. Anemia is a public health concern  
4 as it worsens the prognosis of several diseases such as heart-failure and may increase in-  
5 hospital length of stay (LOS) [3]. Symptoms of anemia are unspecific, and many patients may  
6 be asymptomatic [4]. The quickest therapeutic response to symptomatic anemia is packed red  
7 blood cell (RBC) transfusion. Current recommendations advocate a restrictive transfusion  
8 strategy, meaning not transfusing over a hemoglobin threshold of 70 g.L<sup>-1</sup> in  
9 hemodynamically stable patients [5,6]. However, it remains uncertainty concerning the  
10 transfusion of patients having hemoglobin level between 70 and 90 g.L<sup>-1</sup>.

11 In emergency departments (ED), 12 to 25% of admitted patients may present with anemia  
12 [7,8]. The proportion of patients with symptomatic anemia remains unclear, as patients in the  
13 ED often present complex diseases with overlapping symptoms such as fatigue, dyspnea, or  
14 tachycardia [5]. Conflicting reports suggest over-transfusion strategies in ED [9], increasing  
15 the risk of wrong blood in tube errors, and transfusion related side effect [10,11].  
16 Nevertheless, blood transfusion in ED could account for 10 to 28% of in-hospital  
17 transfusions, annually [12,13]. Studies on RBC transfusion appropriateness shows that it is  
18 ranged between 20 and 40% in ED [13, 14].

19 No study in high-income country showed a benefit for patient with anemia and without life-  
20 threatening condition, to be transfused in ED. We hypothesize that transfusing  
21 hemodynamically stable patients requiring hospitalization, admitted to the ED with anemia  
22 between 70 and 90 g.L<sup>-1</sup> would alter in-hospital LOS. We aimed to determine whether there  
23 was a difference in in-hospital LOS between patients transfused in the ED and those who  
24 were not.

## 1 **Methods**

### 2 *Study settings*

3 This study was a retrospective single-center study in the university hospital of Nîmes, France  
4 conducted between January 1<sup>st</sup> to December 31<sup>st</sup>, 2022. This ED received 119 301 patients in  
5 2022. The local ethics committee of Nimes' university hospital approved the study (IRB  
6 23.05.02). A non-opposition letter was sent to patients or their relative if patients were dead  
7 during hospitalization, explaining the aims of the study and the possibility to oppose to data  
8 collection. Data were collected from May 30<sup>th</sup>, 2023, to September 30<sup>th</sup> 2023. Authors had  
9 access to information that could identify individual participants during data collection, that  
10 were not collected.

11

### 12 *Objectives*

13 The primary outcome was the difference in LOS, measured in days as the time between ED  
14 admission and hospital discharge date, between patients presenting in ED with anemia  
15 between 70 and 90 g.L<sup>-1</sup> with or without transfusion with RBC in the ED. Secondary  
16 outcomes were the in-hospital mortality between the two groups, the difference in long  
17 hospitalization (in-hospital LOS above the cohort median), and differences of LOS  
18 considering the number of RBC transfused in the ED, in ward and in total.

19

### 20 *Population:*

21 The study population involved  $\geq 18$ -year-old patients who presented to the ED with a  
22 biological diagnosis of anemia, characterized by hemoglobin levels between 70 and 90 g.L<sup>-1</sup>,  
23 who were subsequently hospitalized, whatever the reason of hospitalization was. The patients  
24 were clinically stable. Patients with hemorrhagic shock, defined as acute blood loss, either  
25 external or internal, associated with hemodynamic failure and hyperlactatemia greater than 2

1 mmol.L<sup>-1</sup> of traumatic or non-traumatic origin, were not included. Patients requiring surgical  
2 intervention, radiological or endoscopic procedures, or emergency hemostatic procedures, as  
3 well as pregnant women, were excluded. Patients returning home after ED admission were  
4 excluded. Finally, for patients presenting multiple times in ED with anemia, only the first  
5 admission was analyzed.

6

7 *Data collection:*

8 Data were collected retrospectively from patients' electronic files: age, sex, reason for  
9 consultation, arterial blood pressure, heart rate, oxygen saturation, and Charlson's  
10 comorbidity index. Symptoms of anemia were defined by the presence of asthenia, dyspnea,  
11 chest pain, dizziness, syncope or blood loss within the ED admission causes. First ED  
12 biological results were collected: hemoglobin level, mean corpuscular volume, iron and  
13 transferrin saturation coefficient, platelet count, leukocyte count and serum creatinine level.  
14 The presence of RBC transfusion and the number of RBC units transfused in ED were also  
15 collected. The total ED LOS was collected and defined as the time between ED admission and  
16 ED discharge. Boarding, defined by "holding admitted patients in the ED, often in hallways,  
17 while awaiting an inpatient bed" was recorded as an informatic transfer in the hospitalization  
18 waiting zone [15]. Patients transfused in the hospitalization waiting zone were considered as  
19 transfused in ward, as if a bed was available, they would not have stayed in ED.  
20 Hospitalization ward was collected, and classed as medicine ward or intensive care unit  
21 (ICU). Transfusion-related side effects (dyspnea, tachycardia, fever, hypertension, or  
22 hypotension) were recorded on the first day following ED admission. In-hospital death was  
23 also identified from medical files.

24

25 *Statistical analysis:*

1 Missing data were imputed using a linear regression model for hemodynamic parameters if  
2 the number of missing values was less than 25% of the total sample size. For in-hospital LOS,  
3 there was no missing data. Qualitative variables were expressed in absolute value and  
4 percentage. Quantitative variables were expressed in median with the first and third quartiles.  
5 Qualitative variables were compared using the Chi-square test or Fisher's exact test depending  
6 on sample size. Quantitative variables were compared using the Mann-Whitney U test. As in-  
7 hospital death was considered as an adverse effect, adjusted hospital LOS was created,  
8 imputing maximal cohort LOS to in-hospital dead patients.

9 Propensity score analysis was conducted, matching according to ED hemoglobin levels,  
10 Charlson comorbidity index, clinical signs of anemia, presence of chronic anemia, and  
11 hospitalization ward. Description of propensity score is provided in supplemental material S1.

12 Median difference and 95% confidence intervals (95%CI) were calculated for quantitative  
13 variables using resampling with a Bootstrap technique with a sample of  $n = 1000$ . Odds ratios  
14 (OR) were calculated by logistic regression for qualitative variables, along with their 95%CI.

15 Paired groups were compared using a paired Wilcoxon test or a paired Chi-square test for  
16 qualitative variables. Comparison between more than two groups was conducted using  
17 ANOVA, followed by Tukey post-hoc test with a Holm correction for multiple testing. All

18 tests used were two-tailed with significance set at 5%. Being an exploratory study, no number  
19 of subjects was calculated. Data were analyzed and plots were drawn using R software,  
20 version 4.2.2. (R Core Team (2022). R: A language and environment for statistical computing.

21 R Foundation for Statistical Computing, Vienna, Austria), associated with the MatchIt,  
22 multcomp, and epiR packages.

23

24



## 1 **Results**

### 2 *Population characteristics*

3 From January 1<sup>st</sup> to December 31<sup>st</sup>, 2022, 11 208 (9%) had anemia with less than 120 g.L<sup>-1</sup>. A  
4 total of 1 169 (10%) patients having anemia between 70 and 90 g.L<sup>-1</sup> were screened, of which  
5 569 (49%) were excluded: 390 (69%) patients were not hospitalized after ED admission and  
6 55 (10%) had missing data (Figure 1). A total of 564 (48%) unique patients with anemia  
7 between 70 and 90 g.L<sup>-1</sup> were analyzed. Median age of population was 77 [68; 85] years old,  
8 and 240 (43%) were women. Eleven (2%) patients had hemoglobinopathy (sickle cell anemia  
9 or thalassemia) or hydroxocobalamin malabsorption and were not transfused in ED. Median  
10 hemoglobin value at ED admission was 83 [78; 87] g.L<sup>-1</sup>. Main symptoms at ED presentation  
11 were fatigue, dyspnea and recent external blood loss for respectively 128 (23%), 128 (23%)  
12 and 117 (21%) patients. Median ED LOS was 13:42 [7:38 ; 22:52]. Median in-hospital LOS  
13 for the cohort was 10 [5; 17] days. A total of 127 (23%) patients had RBC transfusion in the  
14 ED. Among the 351 (62%) patients transfused during in-hospital stay, the median number of  
15 RBC units transfused was 2 [2; 4]. Patients baseline data are presented in Table 1.

16

### 17 *Primary outcome*

18 After pairing on propensity score, 254 patients remained, 127 per group. Baseline  
19 characteristics were comparable across matched groups, and there were no missing data. The  
20 median in-hospital LOS was 8 [5; 15] for non-ED transfused patients and 9 [5; 19] days for  
21 ED transfused patients (median difference = -1 ; 95%CI = [-3; 2]; p = 0.45). Adjusted hospital  
22 LOS was 11 [6;26] days un non-ED transfused patients, and 11 [6 ; 26] days in ED transfused  
23 patients (median difference = 0 ; 95%CI = [-4 ; 4], p = 0.98). The propensity matched  
24 comparison is presented in Table 2.

25

1 *Secondary outcomes*

2 In-hospital mortality was (19 (15%) in non-ED transfused patients and 19 (15%) in ED-  
3 transfused patients (OR = 1.0, 95%CI = [0.5 ; 2.0], p = 0.86).

4 Long hospitalization was defined above 10 days. Patients with and without long  
5 hospitalization had same initial hemoglobin level (83 [77; 87] vs 83 [78 ; 87] g.L<sup>-1</sup>, p =0.41)  
6 and were transfused in ED in the same proportion (58 (21%) vs 69 (24%), p = 0.96). Patients  
7 with long hospitalization were more prone to be hospitalized in ICU (45 (17%) vs 20 (7%), p  
8 < 0.01) and were more transfused in ward (192 (71%) vs 159 (54%), p < 0.01) than patients  
9 with hospitalization LOS < 10 days.

10 In-hospital LOS for the total population considering the number of RBC units transfused  
11 during total hospitalization was shorter for non-transfused patients than those transfused with  
12  $\geq 3$  RBC units (7 [4; 12] days vs 16 [9; 26] days, p<0.01). The same trend was seen between  
13 patients transfused with 1 or 2 RBC units compared to those transfused with  $\geq 3$  RBC units  
14 (10 [6; 16] days and 16 [9; 26] days (p<0.05)). There was no significant difference in LOS in  
15 patients transfused with 1 or 2 units versus non-transfused (Figure 3A). In contrast, for in-  
16 hospital LOS according to the units of RBC transfused only in the ED, no difference in mean  
17 LOS was seen between any groups: 10 [5; 17] days for non-transfused patients in the ED, 9  
18 [5; 19] days for patients transfused with 1 or 2 RBC units in the ED and 5 [4; 8] days for  
19 those transfused with  $\geq 3$  RBC units (ANOVA's p-value = 0.70) (Figure 3B). In-hospital LOS  
20 considering the units of RBC transfused during ward hospitalization also showed a significant  
21 difference between those receiving  $\geq 3$  units (18 [12; 29]) versus 1 or 2 units (10 [6; 16],  
22 p<0.01) or none (7 [4;12], p<0.01). No difference existed between patients receiving 1 or 2  
23 units versus non-transfused (p=0.78) (Figure 3C).

24

## 1 **Discussion**

2 In patients with a hemoglobin level between 70 and 90 g.L<sup>-1</sup> not in life-threatening emergency  
3 situations, there was no difference in in-hospital LOS between patients transfused or not in  
4 the ED. Patients transfused in ED were more likely to experience boarding than non-ED  
5 transfused patients (OR = 2.7, CI95% [1.6; 4.5]). There was no difference in in-hospital LOS  
6 according to the number of units of RBC transfused in ED alone, yet patients receiving more  
7 units in ward and during total hospitalization had longer LOS by up to 9 days.

8

9 Few studies focus on patient outcome following transfusion in ED. One Rwandan study found  
10 that transfusing patients in ED increased mortality and in-hospital LOS [16]. However,  
11 patients included were younger, hemoglobin admission was lower and blood safety  
12 procedures differ between Europe and Africa, thus the risk of transfusion side effects might be  
13 different [17]. One study, in 12 metropolitan hospitals in France, found that acute bleeding,  
14 history of ischemic cardiopathy and older age were associated with a pre-transfusion  
15 hemoglobin level of 80 g.L<sup>-1</sup>, which seems consistent with our finding [12]. This study found  
16 an in-hospital LOS of 4 days. The difference of LOS could be explained by an older and  
17 sicker population and a higher ICU admission rate in our study [18, 19]. It could also be  
18 linked with a lower care access in non-metropolitan aera. ED-transfused patients were more  
19 prone to experience boarding and higher ED LOS. Even if the design of our study cannot  
20 determine whether boarding is a cause or a consequence of boarding, it is reasonable to think  
21 than transfusion in ED increase ED LOS. RBC transfusion requires a dedicated nurse for at  
22 least the first 15 minutes, and regular monitoring for 1 to 2 hours [20]. In the ED, monitoring  
23 might be impractical for nurses caring for several patients with various severity. Thus, ED-  
24 transfused patients might generate higher workloads for physicians and nurses. This  
25 heightened workload may contribute to higher in-hospital morbidity and mortality among

1 patients with prolonged ED stays requiring hospitalization. The benefit of ED transfusion on  
2 in-hospital LOS could therefore be masked by boarding.

3

4 No protocol exists in our ED that could help to drive transfusion indications, and transfusion  
5 is at physician's discretion. Transfusion protocols save RBC units by transfusing less RBC,  
6 improving appropriateness and developing alternative therapeutic strategies such as ferric  
7 carboxymaltose [7,21]. Other techniques to save RBC units include ED physician and nurse  
8 education about RBC transfusion [22]. One remaining challenge is to identify which patient  
9 should receive RBC transfusion in ED. Patients with history of ischemic cardiomyopathy had  
10 higher rates of transfusion in ED. However, recent studies have shown that even for patients  
11 presenting an acute coronary syndrome, a restrictive strategy did not worsen prognosis [23].

12 Anemia tolerance symptoms are unspecific and can be confused with other conditions. Low  
13 diastolic blood pressure could be associated with a poor tolerance of anemia [24]. Whilst our  
14 data seem to corroborate this hypothesis, with patients in the transfused group having lower  
15 diastolic blood pressure, prospective studies are needed to confirm this. New techniques, such  
16 as microcirculation evaluation could help identify patients with poor anemia tolerance. In the  
17 ICU, monitoring microcirculation before and after RBC transfusion seems promising to  
18 determine which patients could benefit the more of RBC transfusion [25].

19

20 Our data suggest that repeated transfusions in wards could be associated with a longer in-  
21 hospital LOS. In-hospital LOS was not different when considering a hemoglobin level at  
22 admission over or below  $80 \text{ g.L}^{-1}$ . Dharmarajan et al. found that anemia increased LOS more  
23 in men than women [26]. We did not find differences in ED transfusion practice and in-  
24 hospital LOS regarding patient sex. A study from 2018 found that in-hospital LOS for patients  
25 with anemia was of 11 days [3]. This study found that severity of anemia was linked with in-

1 hospital LOS, but no data concerning RBC transfusion were available. Our data showed that  
2 in patients with anemia between 70 and 90 g.L<sup>-1</sup>, the median LOS was 10 days, and seemed to  
3 be related with RBC transfusion during hospitalization.

4

5 We found that patients transfused in ward and receiving  $\geq 3$  RBC units in total had a longer  
6 LOS than patients transfused with  $\leq 2$  RBC units. However, the transfusion of  $\geq 3$  RBC units in  
7 ED was not associated with a significant difference of LOS. Several hypotheses could explain  
8 this observation. Firstly, patients presenting hemorrhagic shock in ED were excluded because  
9 they require immediate RBC transfusion. It is possible that some patients presented acute  
10 hemorrhage during hospitalization, which would increase LOS despite not being present at  
11 ED admission [27]. Secondly, ED physicians may initially have preferred a restrictive  
12 transfusion strategy, followed by a liberal strategy in ward [5]. Thirdly, there could be a risk  
13 of iatrogenic anemia due to multiple blood tests [28]. A vicious circle could lead to patients  
14 staying longer having more blood tests, and thus worsening hemoglobin level, requiring more  
15 RBC transfusion. A stricter control of the indications of blood tests, and lower blood volume  
16 in tests, could lower the risk of iatrogenic anemia, without impairing test quality [29].

17

18 Strengths of this study included the large total population, allowing us to conduct a propensity  
19 score on a large sample, with a good homogeneity between groups. Secondly, all consecutive  
20 patients in a calendar year were included, homogenizing the population in the standard of  
21 care. Thirdly, we included medical and surgical patients, while most studies focus on surgical  
22 patients [29]. This is of interest because ED patients fall into both fields, although medical  
23 patients are more common. The results of our study are consistent with the literature  
24 concerning LOS in anemic patients, around 11 to 14 days [3]. Finally, we excluded patients

1 with hemorrhagic shock or needing an immediate surgical or interventional procedure, who  
2 needed an immediate transfusion regardless of their hemoglobin level.

3 Limitations:

4 Our study contains some limitations. This was a single-center study, and the local practice  
5 could probably not be extrapolated to all hospitals and areas. The retrospective setting limited  
6 the collection of some data, such as symptoms of anemia that were extracted from electronic  
7 files but could also be due to other health conditions. The hemoglobin cut-off between 70 to  
8 90 g.L<sup>-1</sup> could constitute a limit, as it is considered as severe anemia. However, recent  
9 recommendations suggest focusing more on anemia tolerance than on hemoglobin level, and  
10 that a threshold of 70 g.L<sup>-1</sup> could be fare for most patients [6]. Hemodynamics data were not  
11 fully available, and needed to be imputed by logistical regression, which limits the validity of  
12 those data. In the excluded population, 390 (69%) were not hospitalized. A comparison of  
13 those patients with the hospitalized ones would be interesting. We did not analyze the reason  
14 for admission in both groups, assuming that it would not be linked with RBC transfusion  
15 requirement. Finally, we do not know if RBC transfusion in ED was appropriate for most  
16 patients. This is the main limitation, as the main problem of RBC transfusion in ED is  
17 transfusion appropriateness [12].

18

19

1 *Conclusion*

2 In stable patients with anemia, presenting hemoglobin levels between 70 and 90 g.L<sup>-1</sup>, who  
3 require hospitalization, there was no benefit in terms of hospital length of stay or mortality  
4 from transfusing them in the ED rather than on the wards. However, it increased boarding.  
5 Future investigations should determine which patients should be transfused immediately in  
6 the ED to improve safety and efficiency of ED organization.

7 **Acknowledgements**

8 We thank Sarah Kabani for editing the manuscript. We thank Myriam Mezzarobba for her  
9 advices on statistical analysis.

10

11

## 1 **References**

- 2 1. McLean E, Cogswell M, Egli I, Wojdyla D, de Benoist B. Worldwide prevalence of  
3 anaemia, WHO Vitamin and Mineral Nutrition Information System, 1993-2005. Public  
4 Health Nutr. 2009; **12**:444-54.
- 5 2. Groenveld HF, Januzzi JL, Damman K, van Wijngaarden J, Hillege HL,  
6 van Veldhuisen DJ, et al. Anemia and Mortality in Heart Failure Patients: A Systematic  
7 Review and Meta-Analysis. J Am Coll Cardiol. 2008 ; **52**:818-27.
- 8 3. Zaninetti C, Klersy C, Scavariello C, Bastia R, Balduini CL, Invernizzi R. Prevalence  
9 of anemia in hospitalized internal medicine patients: Correlations with comorbidities and  
10 length of hospital stay. Euro J Intern Med. 2018 ; **51**:11-7.
- 11 4. Lanier JB, Park JJ, Callahan RC. Anemia in Older Adults. Am Fam Physician. 2018 ;  
12 **98**:437-42.
- 13 5. Carson JL, Stanworth SJ, Dennis JA, Trivella M, Roubinian N, Fergusson DA, et al.  
14 Transfusion thresholds for guiding red blood cell transfusion. Cochrane Database Syst Rev.  
15 2021 ; **2021**:CD002042.
- 16 6. Carson JL, Stanworth SJ, Guyatt G, Valentine S, Dennis J, Bakhtary S, et al. Red  
17 Blood Cell Transfusion: 2023 AABB International Guidelines. JAMA. 2023 ; **330** :1892.
- 18 7. Spradbrow J, Lin Y, Shelton D, Callum J. Iron deficiency anemia in the emergency  
19 department: over-utilization of red blood cell transfusion and infrequent use of iron  
20 supplementation. CJEM. 2017 ; **19** : 167-74.
- 21 8. Beverina I, Brando B. Prevalence of anemia and therapeutic behavior in the  
22 emergency department at a tertiary care Hospital: Are patient blood management principles  
23 applied? Transfus Apher Sci. 2019 ; **58** :688-92.
- 24 9. Quintana Díaz M, Borobia AM, García Erce JA, Maroun-Eid C, Fabra S, Carcas A, et  
25 al. Appropriate use of red blood cell transfusion in emergency departments:a study in five



- 1 emergency departments. *Blood Transfus* 2017; **15**: 199-206
- 2 10. Dunbar NM, Delaney M, Murphy MF, Pagano MB, Saifee NH, Seheult J, et al.
- 3 Emergency departments are higher-risk locations for wrong blood in tube errors. *Transfusion*.
- 4 2021 ; **61** : 2601-10.
- 5 11. Long B, Koyfman A. Red Blood Cell Transfusion in the Emergency Department. *J*
- 6 *Emerg Med*. 2016 ; **51** :120-30.
- 7 12. Peyrony O, Gamelon D, Brune R, Chauvin A, Ghazali DA, Yordanov Y, et al. Red
- 8 Blood Cell Transfusion in the Emergency Department: An Observational Cross-Sectional
- 9 Multicenter Study. *J Clin Med*. 2021 ; **10**:2475.
- 10 13. Paganini M, Rigon F, Rebusello F, Cianci V, Bertozzi I, Randi ML. Appropriateness
- 11 of packed red blood cells transfusions in chronic anemic patients in the emergency
- 12 department: the TRANSFUS-ED retrospective analysis. *Intern Emerg Med*. 2023 ; **18** :
- 13 1815-21.
- 14 14. Langlais ML, Dargère M, Le Niger C, Goetghebeur D. [Appropriate use of red blood
- 15 cell transfusion in the emergency department before and after a specific protocol]. *Transfus*
- 16 *Clin Biol*. 2019 ; **26** : 38-47.
- 17 15. Janke AT, Melnick ER, Venkatesh AK. Hospital Occupancy and Emergency
- 18 Department Boarding During the COVID-19 Pandemic. *JAMA Netw Open*. 2022 ; **5** :
- 19 e2233964.
- 20 16. Moretti K, Marqués CG, Garbern S, Mbanjumucyo G, Uwamahoro C, Beaudoin FL,
- 21 et al. Transfusion, mortality and hemoglobin level: Associations among emergency
- 22 department patients in Kigali, Rwanda. *Afr J Emerg Med*. 2020 ; **10** :68-73.
- 23 17. Custer B, Zou S, Glynn S, Makani J, Tagny CT, Ekiaby ME, et al. Addressing Gaps in
- 24 International Blood Availability and Transfusion Safety in Low and Middle Income Countries
- 25 (LMIC): A NHLBI Workshop. *Transfusion*. 2018 ; **58** :1307-17.

- 1 18. Lee KS, Min HS, Moon JY, Lim D, Kim Y, Ko E, et al. Patient and hospital  
2 characteristics predict prolonged emergency department length of stay and in-hospital  
3 mortality: a nationwide analysis in Korea. *BMC Emerg Med.* 2022 ; **22** : 183.
- 4 19. Bahrmann A, Benner L, Christ M, Bertsch T, Sieber CC, Katus H, et al. The Charlson  
5 Comorbidity and Barthel Index predict length of hospital stay, mortality, cardiovascular  
6 mortality and rehospitalization in unselected older patients admitted to the emergency  
7 department. *Aging Clin Exp Res.* 2019 ; **31** : 1233-42.
- 8 20. Lotterman S, Sharma S. Blood Transfusion. In: StatPearls [Internet]. Treasure Island  
9 (FL): StatPearls Publishing; 2024 [cited may 1 2024]. Available on :  
10 <http://www.ncbi.nlm.nih.gov/books/NBK499824/>
- 11 21. Beverina I, Razionale G, Ranzini M, Aloni A, Finazzi S, Brando B. Early intravenous  
12 iron administration in the Emergency Department reduces red blood cell unit transfusion,  
13 hospitalisation, re-transfusion, length of stay and costs. *Blood Transfus.* 2020 ; **18** : 106-16.
- 14 22. Riveira MC, Fredrickson TA, Iha BR, Mitchell SH, White NJ, Arbabi S, et al.  
15 Improving emergency department blood product use through nursing education. *Transfusion.*  
16 2020 ; **60** : 1227-30.
- 17 23. Carson JL, Brooks MM, Hébert PC, Goodman SG, Bertolet M, Glynn SA, et al.  
18 Restrictive or Liberal Transfusion Strategy in Myocardial Infarction and Anemia. *N Engl J*  
19 *Med.* 2023 ; **389** : 2446-56.
- 20 24. Atsma F, Veldhuizen I, de Kort W, van Kraaij M, Pasker-de Jong P, Deinum J.  
21 Hemoglobin level is positively associated with blood pressure in a large cohort of healthy  
22 individuals. *Hypertension.* 2012 ; **60** : 936-41.
- 23 25. Van Manen L, Deurvorst JM, Van Hezel ME, Boshuizen M, Van Bruggen R,  
24 Juffermans NP. Severity of illness influences the microcirculatory response to red blood cell  
25 transfusion in the critically ill: an observational cohort study. *Crit Care.* 2020 ; **24** : 498.

- 1 26. Dharmarajan TS, Pankratov A, Morris E, Qurashi S, Law G, Phillips S, et al. Anemia:  
2 its impact on hospitalizations and length of hospital stay in nursing home and community  
3 older adults. *J Am Med Dir Assoc.* 2008 ; **9** : 354-9.
- 4 27. Faria I, Thivalapill N, Makin J, Puyana JC, Raykar N. Bleeding, Hemorrhagic Shock,  
5 and the Global Blood Supply. *Crit Care Clin.* 2022 ; **38** : 775-93.
- 6 28. Chant C, Wilson G, Friedrich JO. Anemia, transfusion, and phlebotomy practices in  
7 critically ill patients with prolonged ICU length of stay: a cohort study. *Crit Care.* 2006 ; **10** :  
8 R140.
- 9 28. Siegal DM, Belley-Côté EP, Lee SF, Hill S, D’Aragon F, Zarychanski R, et al. Small-  
10 Volume Blood Collection Tubes to Reduce Transfusions in Intensive Care: The STRATUS  
11 Randomized Clinical Trial. *JAMA.* 2023 ; **330** : 1872.
- 12 29. Cahill CM, Alhasson B, Blumberg N, Melvin A, Knight P, Gloff M, et al.  
13 Preoperative anemia management program reduces blood transfusion in elective cardiac  
14 surgical patients, improving outcomes and decreasing hospital length of stay. *Transfusion.*  
15 2021 ; **61** :2629-36  
16  
17

- 1 Figure 1: Flow chart
- 2 ED: Emergency department, Hb: hemoglobin
- 3

1 Figure 2: Comparison of in-hospital length of stay according to number of units and place of  
2 transfusion in the whole cohort (n = 564 patients): A. During total stay, B. In emergency  
3 department only, C. In-hospitalization only.

4 LOS: length of stay, ED: Emergency department, RBC: red blood cell

5 NS: not significant; \* p-value < 0.05; \*\* p-value < 0.01; \*\*\* p-value < 0.001

6

|                                              | Total<br>n = 564 | Non-ED<br>transfused<br>patients<br>n = 437 | ED transfused<br>patients<br>n = 127 | p-value |
|----------------------------------------------|------------------|---------------------------------------------|--------------------------------------|---------|
| <b>Demographics</b>                          |                  |                                             |                                      |         |
| Age in years, m [Q1; Q3]                     | 77 [68; 85]      | 76 [67; 86]                                 | 78 [70; 84]                          | 0.95    |
| Sex, women, n(%)                             | 240 (43)         | 189 (43)                                    | 51 (40)                              | 0.54    |
| <b>Medical history</b>                       |                  |                                             |                                      |         |
| Charlson comorbidity index, m [Q1; Q3]       | 4 [2; 6]         | 4 [2; 6]                                    | 4 [2; 6]                             | 0.96    |
| Myocardial infarction, n(%)                  | 112 (20)         | 74 (17)                                     | 38 (30)                              | < 0.01  |
| Chronic heart failure, n(%)                  | 51 (9)           | 37 (8)                                      | 14 (11)                              | 0.38    |
| Chronic obstructive pulmonary disease, n(%)  | 84 (15)          | 55 (13)                                     | 29 (23)                              | < 0.01  |
| Chronic kidney disease, n(%)                 | 211 (37)         | 165 (38)                                    | 46 (36)                              | 0.84    |
| Chronic anemia, n(%)                         | 360 (64)         | 298 (68)                                    | 62 (49)                              | < 0.01  |
| <b>Symptoms reported at ED admission</b>     |                  |                                             |                                      |         |
| Fatigue, n(%)                                | 128 (23)         | 102 (23)                                    | 36 (28)                              | 0.24    |
| Dyspnea, n(%)                                | 128 (23)         | 99 (23)                                     | 29 (23)                              | > 0.99  |
| Recent external blood loss, n(%)             | 117 (21)         | 55 (13)                                     | 62 (49)                              | < 0.01  |
| Fall, n(%)                                   | 60 (11)          | 54 (12)                                     | 6 (5)                                | 0.01    |
| Chest pain, n(%)                             | 25 (4)           | 24 (5)                                      | 1 (1)                                | < 0.05  |
| Syncope, n(%)                                | 14 (2)           | 11 (3)                                      | 3 (2)                                | > 0.99  |
| Dizziness, n(%)                              | 4 (1)            | 2 (0)                                       | 2 (2)                                | 0.22    |
| Symptoms of anemia\$, n(%)                   | 383 (68)         | 277 (63)                                    | 106 (83)                             | < 0.01  |
| <b>Vital parameters</b>                      |                  |                                             |                                      |         |
| Systolic blood pressure in mmHg, m [Q1; Q3]  | 126 [111; 137]   | 126 [114; 140]                              | 121 [105; 132]                       | < 0.01  |
| Diastolic blood pressure in mmHg, m [Q1; Q3] | 66 [58; 74]      | 67 [60; 75]                                 | 62 [53; 70]                          | < 0.01  |
| Heart rate in beats per minute, m [Q1; Q3]   | 89 [80; 100]     | 89 [82; 100]                                | 89 [75; 99]                          | 0.42    |

|                                                      |                      |                      |                       |        |
|------------------------------------------------------|----------------------|----------------------|-----------------------|--------|
| Oxygen saturation in %, m [Q1; Q3]                   | 97 [96; 98]          | 97 [96; 98]          | 97 [96; 98]           | 0.20   |
| <b>Biological parameters</b>                         |                      |                      |                       |        |
| Hemoglobin in g.L <sup>-1</sup> , m [Q1; Q3]         | 83 [78; 87]          | 84 [80; 88]          | 77 [73; 83]           | < 0.01 |
| MCV in fL, m [Q1; Q3]                                | 93 [86; 99]          | 92 [86; 99]          | 95 [88; 100]          | 0.05   |
| Iron status assessed, n(%)                           | 76 (13)              | 46 (11)              | 30 (24)               | < 0.01 |
| Platelets in G.L <sup>-1</sup> , m [Q1; Q3]          | 233 [147; 340]       | 226 [135; 344]       | 254 [177; 330]        | 0.18   |
| Leukocytes in G.L <sup>-1</sup> , m [Q1; Q3]         | 9.4 [6.3; 13.5]      | 9.4 [6.0; 13.6]      | 9.6 [6.8; 12.8]       | 0.97   |
| Serum creatinine level in μmol.L <sup>-1</sup>       | 106 [73; 168]        | 106 [71; 172]        | 101 [78; 148]         | 0.52   |
| <b>Hospitalization ward</b>                          |                      |                      |                       |        |
| Medicine, n(%)                                       | 499 (88)             | 387 (89)             | 112 (88)              | 0.88   |
| Intensive care unit, n(%)                            | 65 (12)              | 50 (11)              | 15 (12)               |        |
| <b>Outcomes</b>                                      |                      |                      |                       |        |
| ED LOS in hh:mm, m [Q1 ; Q3]                         | 13:24 [7:38 ; 22:52] | 12:29 [7:08 ; 21:50] | 17:43 [11:00 ; 24:40] | < 0.01 |
| Boarding, n(%)                                       | 190 (34)             | 130 (30)             | 60 (47)               | < 0.01 |
| More than 1 day stay in ED, n(%)                     | 124 (22)             | 89 (21)              | 35 (28)               | 0.11   |
| Transfusion-related side effect, n(%)                | 7 (1)                | 3 (1)                | 4 (3)                 | < 0.05 |
| Transfusion during hospital stay, n(%)               | 351 (62)             | 276 (63)             | 75 (59)               | 0.41   |
| Number of RBC units transfused in ward *, m [Q1; Q3] | 2 [1; 3]             | 2 [1; 3]             | 2 [1; 3]              | 0.56   |
| Total number of RBC units transfused*, m [Q1; Q3]    | 2 [2; 4]             | 2 [1; 3]             | 4 [3; 5]              | < 0.01 |
| Hospital LOS in days, m [Q1; Q3]                     | 10 [5;17]            | 10 [5; 17]           | 9 [5; 19]             | 0.71   |
| Adjusted hospital LOS in days, m [Q1; Q3]            | 12 [6; 27]           | 12 [6; 27]           | 11 [6; 26]            | 0.94   |
| In-hospital death, n(%)                              | 86 (34)              | 68 (33)              | 18 (38)               | 0.61   |

1

2 Table 1: Characteristics of the global study population and considering the localization of  
3 their first transfusion.

4 ED: emergency department, MCV: mean corpuscular volume, RBC: red blood cell

1 § Symptoms of anemia corresponded to presentation to emergency department with a  
2 complaint of asthenia or external blood loss or chest pain or syncope or dizziness or fall or  
3 fatigue or dyspnea.

4 \* Count for 351 (62%) patients: 75 (59%) transfused in ED and 276 (63%) not transfused in  
5 emergency department.

6



|                                              | Non-ED transfused<br>patients<br>n = 127 | ED transfused<br>patients<br>n = 127 | Median difference<br>and 95%CI | OR and 95% CI   | p-value |
|----------------------------------------------|------------------------------------------|--------------------------------------|--------------------------------|-----------------|---------|
| <b>Demographics</b>                          |                                          |                                      |                                |                 |         |
| Age in years, m [Q1; Q3]                     | 76 [67; 86]                              | 78 [70; 84]                          | -2 [-5; 3]                     | 1.0 [1.0; 1.0]  | 0.88    |
| Sex women, n(%)                              | 56 (44)                                  | 51 (40)                              |                                | 1.2 [0.7; 1.9]  | 0.40    |
| <b>Medical history</b>                       |                                          |                                      |                                |                 |         |
| Charlson comorbidity index, m [Q1;Q3]        | 4 [2 ; 6]                                | 4 [2 ; 6]                            | 0 [-2 ; 1]                     | 1.0 [0.9 ; 1.1] | 0.81    |
| Myocardial infarction, n(%)                  | 18 (14)                                  | 38 (30)                              |                                | 2.6 [1.4; 4.8]  | < 0.01  |
| Chronic heart failure, n(%)                  | 9 (7)                                    | 14 (11)                              |                                | 1.6 [0.7; 3.9]  | 0.53    |
| Chronic obstructive pulmonary disease, n(%)  | 14 (11)                                  | 29 (23)                              |                                | 2.4 [1.2; 4.8]  | < 0.01  |
| Chronic kidney disease, n(%)                 | 38 (30)                                  | 46 (36)                              |                                | 1.3 [0.8; 2.3]  | 0.51    |
| Chronic anemia, n(%)                         | 69 (54)                                  | 62 (48)                              |                                | 0.8 [0.5 ; 1.3] | 0.38    |
| <b>Vital parameters</b>                      |                                          |                                      |                                |                 |         |
| Systolic blood pressure in mmHg, m [Q1; Q3]  | 127 [118; 140]                           | 121 [105; 132]                       | 6 [0 ; 12]                     | 1.0 [1.0; 1.0]  | < 0.01  |
| Diastolic blood pressure in mmHg, m [Q1; Q3] | 67 [60; 76]                              | 62 [53; 70]                          | 4 [1; 9]                       | 1.0 [1.0; 1.0]  | <0.01   |
| Heart rate in beat per minute, m [Q1;        | 88 [80; 98]                              | 89 [75; 99]                          | -0 [-4; 4]                     | 1.0 [1.0; 1.0]  | 0.61    |

Q3]

**Biological parameters**

|                                              |             |              |            |                |        |
|----------------------------------------------|-------------|--------------|------------|----------------|--------|
| Hemoglobin in g.L <sup>-1</sup> , m [Q1; Q3] | 79 [74; 83] | 77 [73; 83]  | 2 [0; 4]   | 0.7 [0.4; 1.1] | 0.09   |
| MCV in fL, m [Q1; Q3]                        | 91 [83; 99] | 95 [88; 100] | -3 [-6; 0] | 1.0 [1.0; 1.1] | < 0.01 |
| Iron status assessed, n(%)                   | 24 (19)     | 30 (24)      |            | 1.2 [1.0; 3.6] | 0.05   |

**Outcomes**

|                                                    |                      |                       |             |                 |        |
|----------------------------------------------------|----------------------|-----------------------|-------------|-----------------|--------|
| Hospital ward, medicine, n(%)                      | 114 (90)             | 112 (88)              |             | 0.9 [0.4 ; 1.9] | 0.69   |
| ED LOS in hh:mm, m [Q1 ; Q3]                       | 11:29 [6:59 ; 19:12] | 17:43 [11:00 ; 23:40] | 6 [1 ; 11]  | 1.0 [1.0 ; 1.0] | < 0.01 |
| Boarding, n(%)                                     | 34 (27)              | 60 (47)               |             | 2.5 [1.5; 4.1]  | < 0.01 |
| More than 1 day stay in ED, n(%)                   | 24 (19)              | 35 (28)               |             | 1.6 [0.9 ; 2.9] | 0.12   |
| Transfusion related side effect, n(%)              | 2 (2)                | 4 (3)                 |             | 2.0 [0.4; 11.3] | 0.17   |
| Transfusion during hospital stay, n(%)             | 84 (66)              | 75 (59)               |             | 0.7 [0.4; 1.2]  | 0.19   |
| Number of RBC units transfused in ward, m [Q1; Q3] | 2 [2;3]              | 2 [1;3]               | 0 [0; 0]    | 1 [0.9; 1.2]    | 0.18   |
| Total number of RBC units transfused, m [Q1; Q3]   | 2 [2; 3]             | 4 [3; 5]              | -2 [-2; -1] | 1.4 [1.2; 1.7]  | < 0.01 |
| Hospital LOS in days, m [Q1; Q3]                   | 8 [5; 15]            | 9 [5; 19]             | -1 [-3; 2]  | 1.0 [1.0; 1.0]  | 0.45   |
| Adjusted hospital LOS in days, m [Q1; Q3]          | 11 [6; 26]           | 11 [6; 26]            | 0 [-4; 4]   | 1.0 [1.0; 1.0]  | 0.98   |
| In hospital death, n(%)                            | 19 (15)              | 19 (15)               |             | 1.0 [0.5; 2.0]  | 0.86   |

Table 2: Comparison of baseline characteristics and main outcomes between patients transfused in emergency department or not, after pairing on propensity score, taking into account Charlson's comorbidity index, hospitalization ward, symptoms of anemia, hemoglobin level and chronic anemia.

OR: odds ratio, 95%CI: 95% confidence interval, ED: emergency department, MCV: mean corpuscular volume, RBC: Red blood cell

|                                             | LOS ≤ 10<br>days<br>n = 293 | LOS > 10<br>days<br>n = 271 | p-value |
|---------------------------------------------|-----------------------------|-----------------------------|---------|
| <b>Demographics</b>                         |                             |                             |         |
| Age in years, m [Q1; Q3]                    | 76 [66; 85]                 | 78 [70; 85]                 | 0.10    |
| Sex, women, n(%)                            | 136 (46)                    | 104 (38)                    | 0.06    |
| <b>Medical history</b>                      |                             |                             |         |
| Charlson's comorbidity index, m [Q1;Q3]     | 4 [2;6]                     | 4 [2;6]                     | 0.13    |
| Chronic anemia, n(%)                        | 190 (65)                    | 170 (63)                    | 0.66    |
| <b>Biological parameters</b>                |                             |                             |         |
| Hemoglobin in g.L <sup>-1</sup> , m [Q1;Q3] | 83 [78; 87]                 | 83 [77; 87]                 | 0.41    |
| Symptoms of anemia, n(%)                    | 200 (68)                    | 183 (68)                    | 0.86    |
| <b>Hospitalization ward</b>                 |                             |                             |         |
| Medicine, n(%)                              | 273 (93)                    | 226 (83)                    | < 0.01  |
| <b>Outcomes</b>                             |                             |                             |         |
| ED LOS in hh:mm, m[Q1;Q3]                   | 13:52 [8:07 ;<br>22:23]     | 13:13 [7:22 ;<br>23:42]     | 0.96    |
| Boarding, n(%)                              | 102 (35)                    | 88 (32)                     | 0.59    |
| ED-transfused, n(%)                         | 69 (24)                     | 58 (21)                     | 0.55    |
| Ward transfused, n(%)                       | 159 (54)                    | 192 (71)                    | < 0.01  |
| Hospital death, n(%)                        | 1 (0)                       | 85 (31)                     | < 0.01  |

Table 3: Comparison of baseline characteristics and main outcomes between patients with or without a long-adjusted length of stay (defined by the median length of stay of the entire cohort).

ED : Emergency department

Patients admitted in ED between January 1<sup>st</sup> and December 31<sup>st</sup>, 2022  
n = 119 301

Patients not included  
No biology in ED : n = 76 144 (64%)  
Hb > 120 g.L<sup>-1</sup> : n = 31 949 (27%)

Patients with Hb ≤ 120 g.L<sup>-1</sup>  
n = 11 208 (9%)

Patients not included  
Hb < 70 g.L<sup>-1</sup> : 455 (4%)  
Hb > 90 g.L<sup>-1</sup> : 9 548 (85%)

Patients with 70 g.L<sup>-1</sup> ≤ Hb ≤ 90 g.L<sup>-1</sup>  
n = 1 169 (10%)

Non included patients  
n = 569 (49%) :

|                                     |               |
|-------------------------------------|---------------|
| Not hospitalized :                  | n = 390 (69%) |
| Aged < 18 years old :               | n = 76 (13%)  |
| Missing data :                      | n = 55 (10%)  |
| Hemorrhagic shock :                 | n = 34 (6%)   |
| Hospitalization in other hospital : | n = 8 (1%)    |
| File mistake :                      | n = 6 (1%)    |

Patients included  
n = 600 (51 %)

Patients excluded for multiple admissions  
n = 36 (6%)

Patients analyzed  
n = 564 (94 %)

Patients not transfused in ED  
n = 437 (77%)

Patients transfused in ED  
n = 127 (23%)

medRxiv preprint doi: <https://doi.org/10.1101/2024.09.11.24313465>; this version posted September 12, 2024. The copyright holder for this preprint (which was not certified by peer review) is the author/funder, who has granted medRxiv a license to display the preprint in perpetuity. All rights reserved. No reuse allowed without permission.

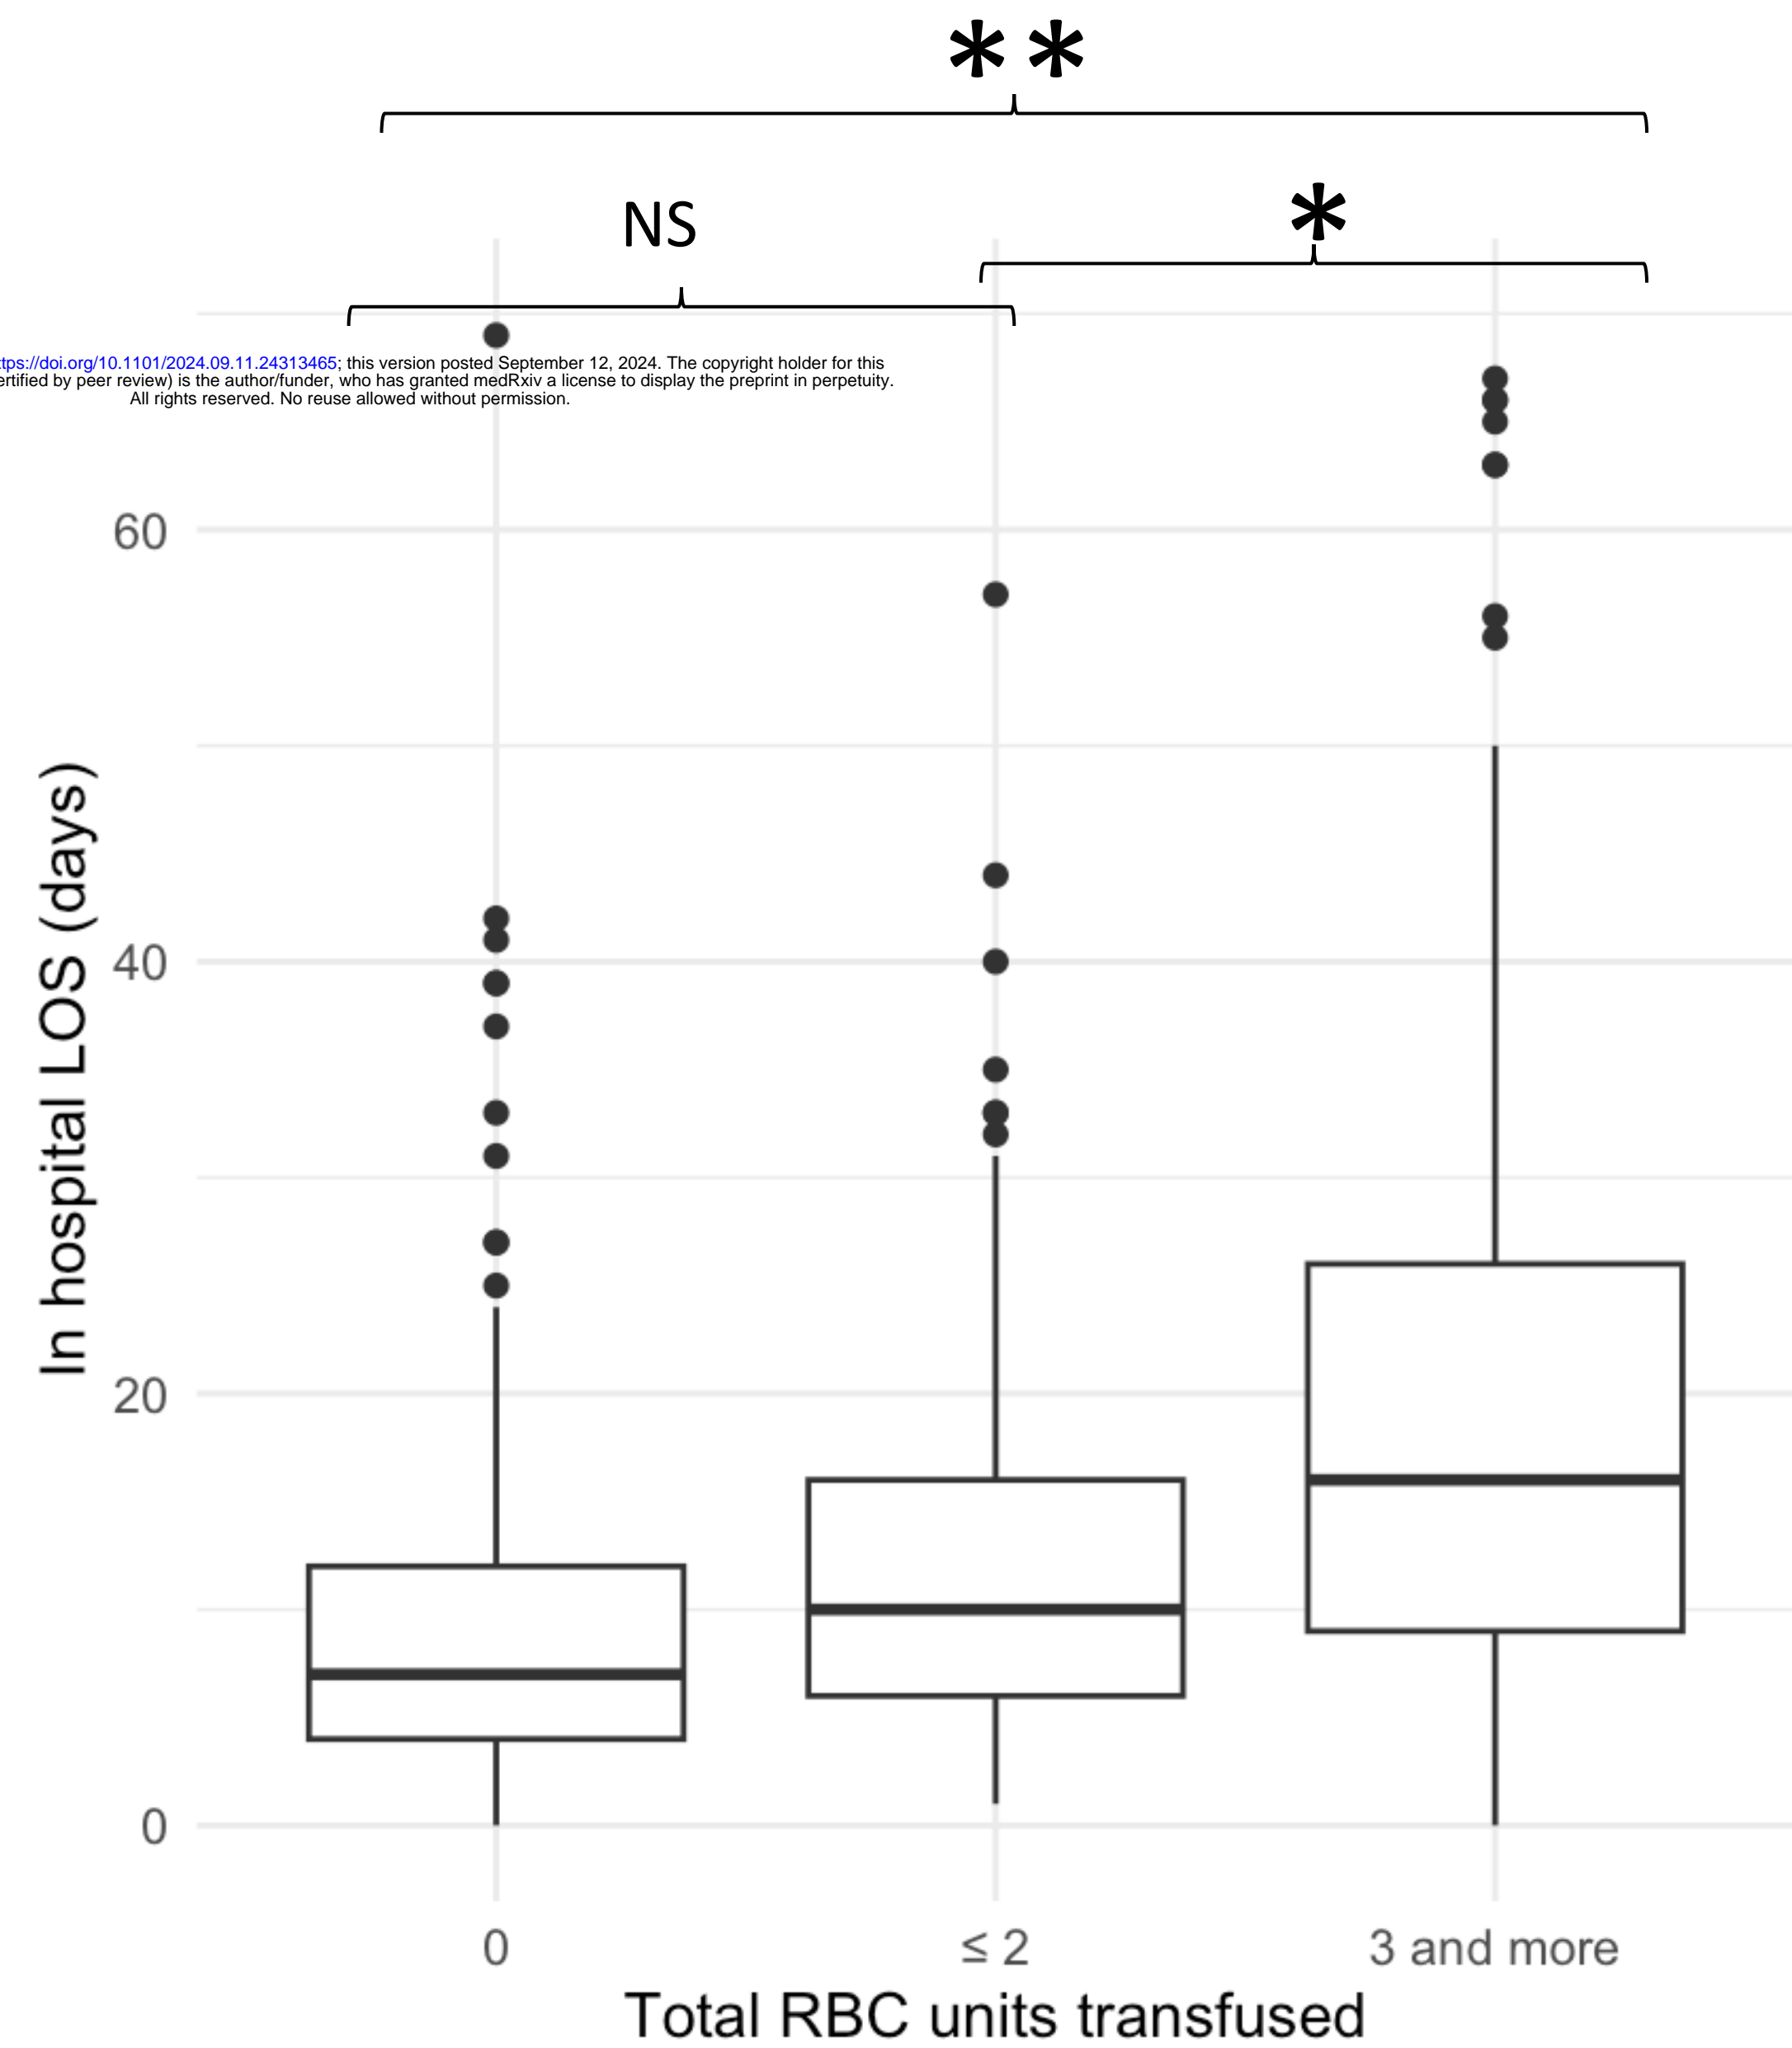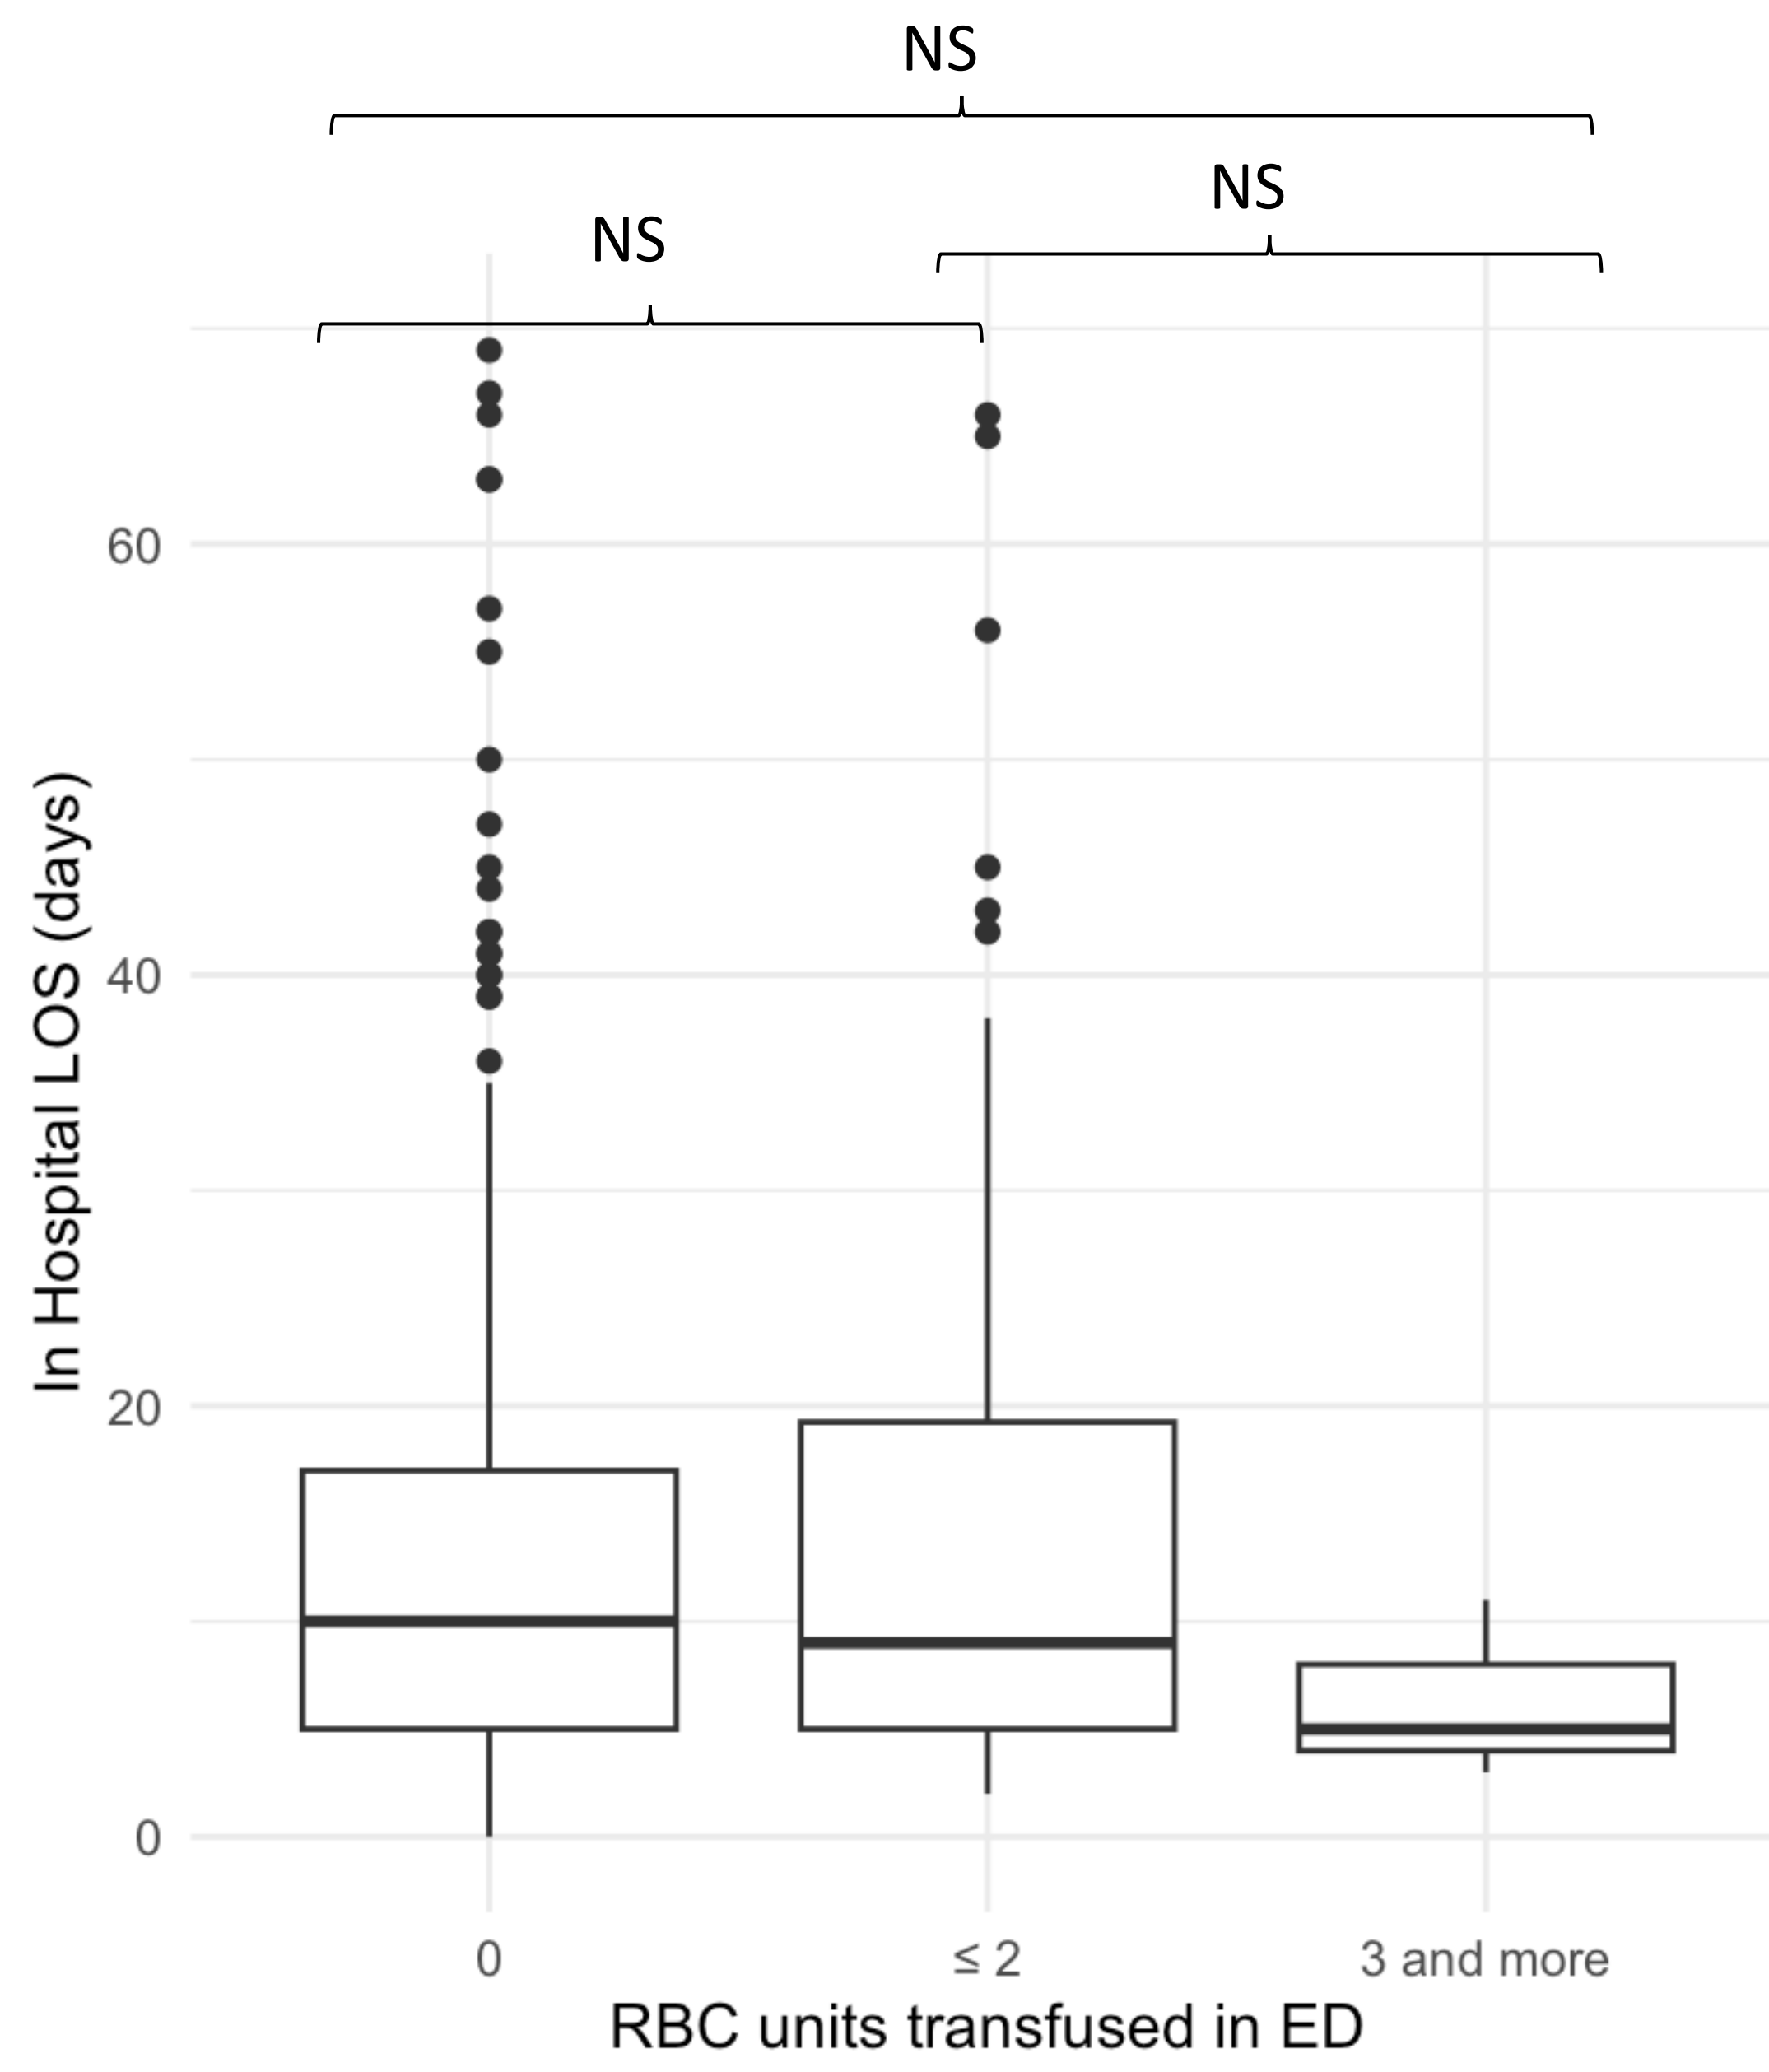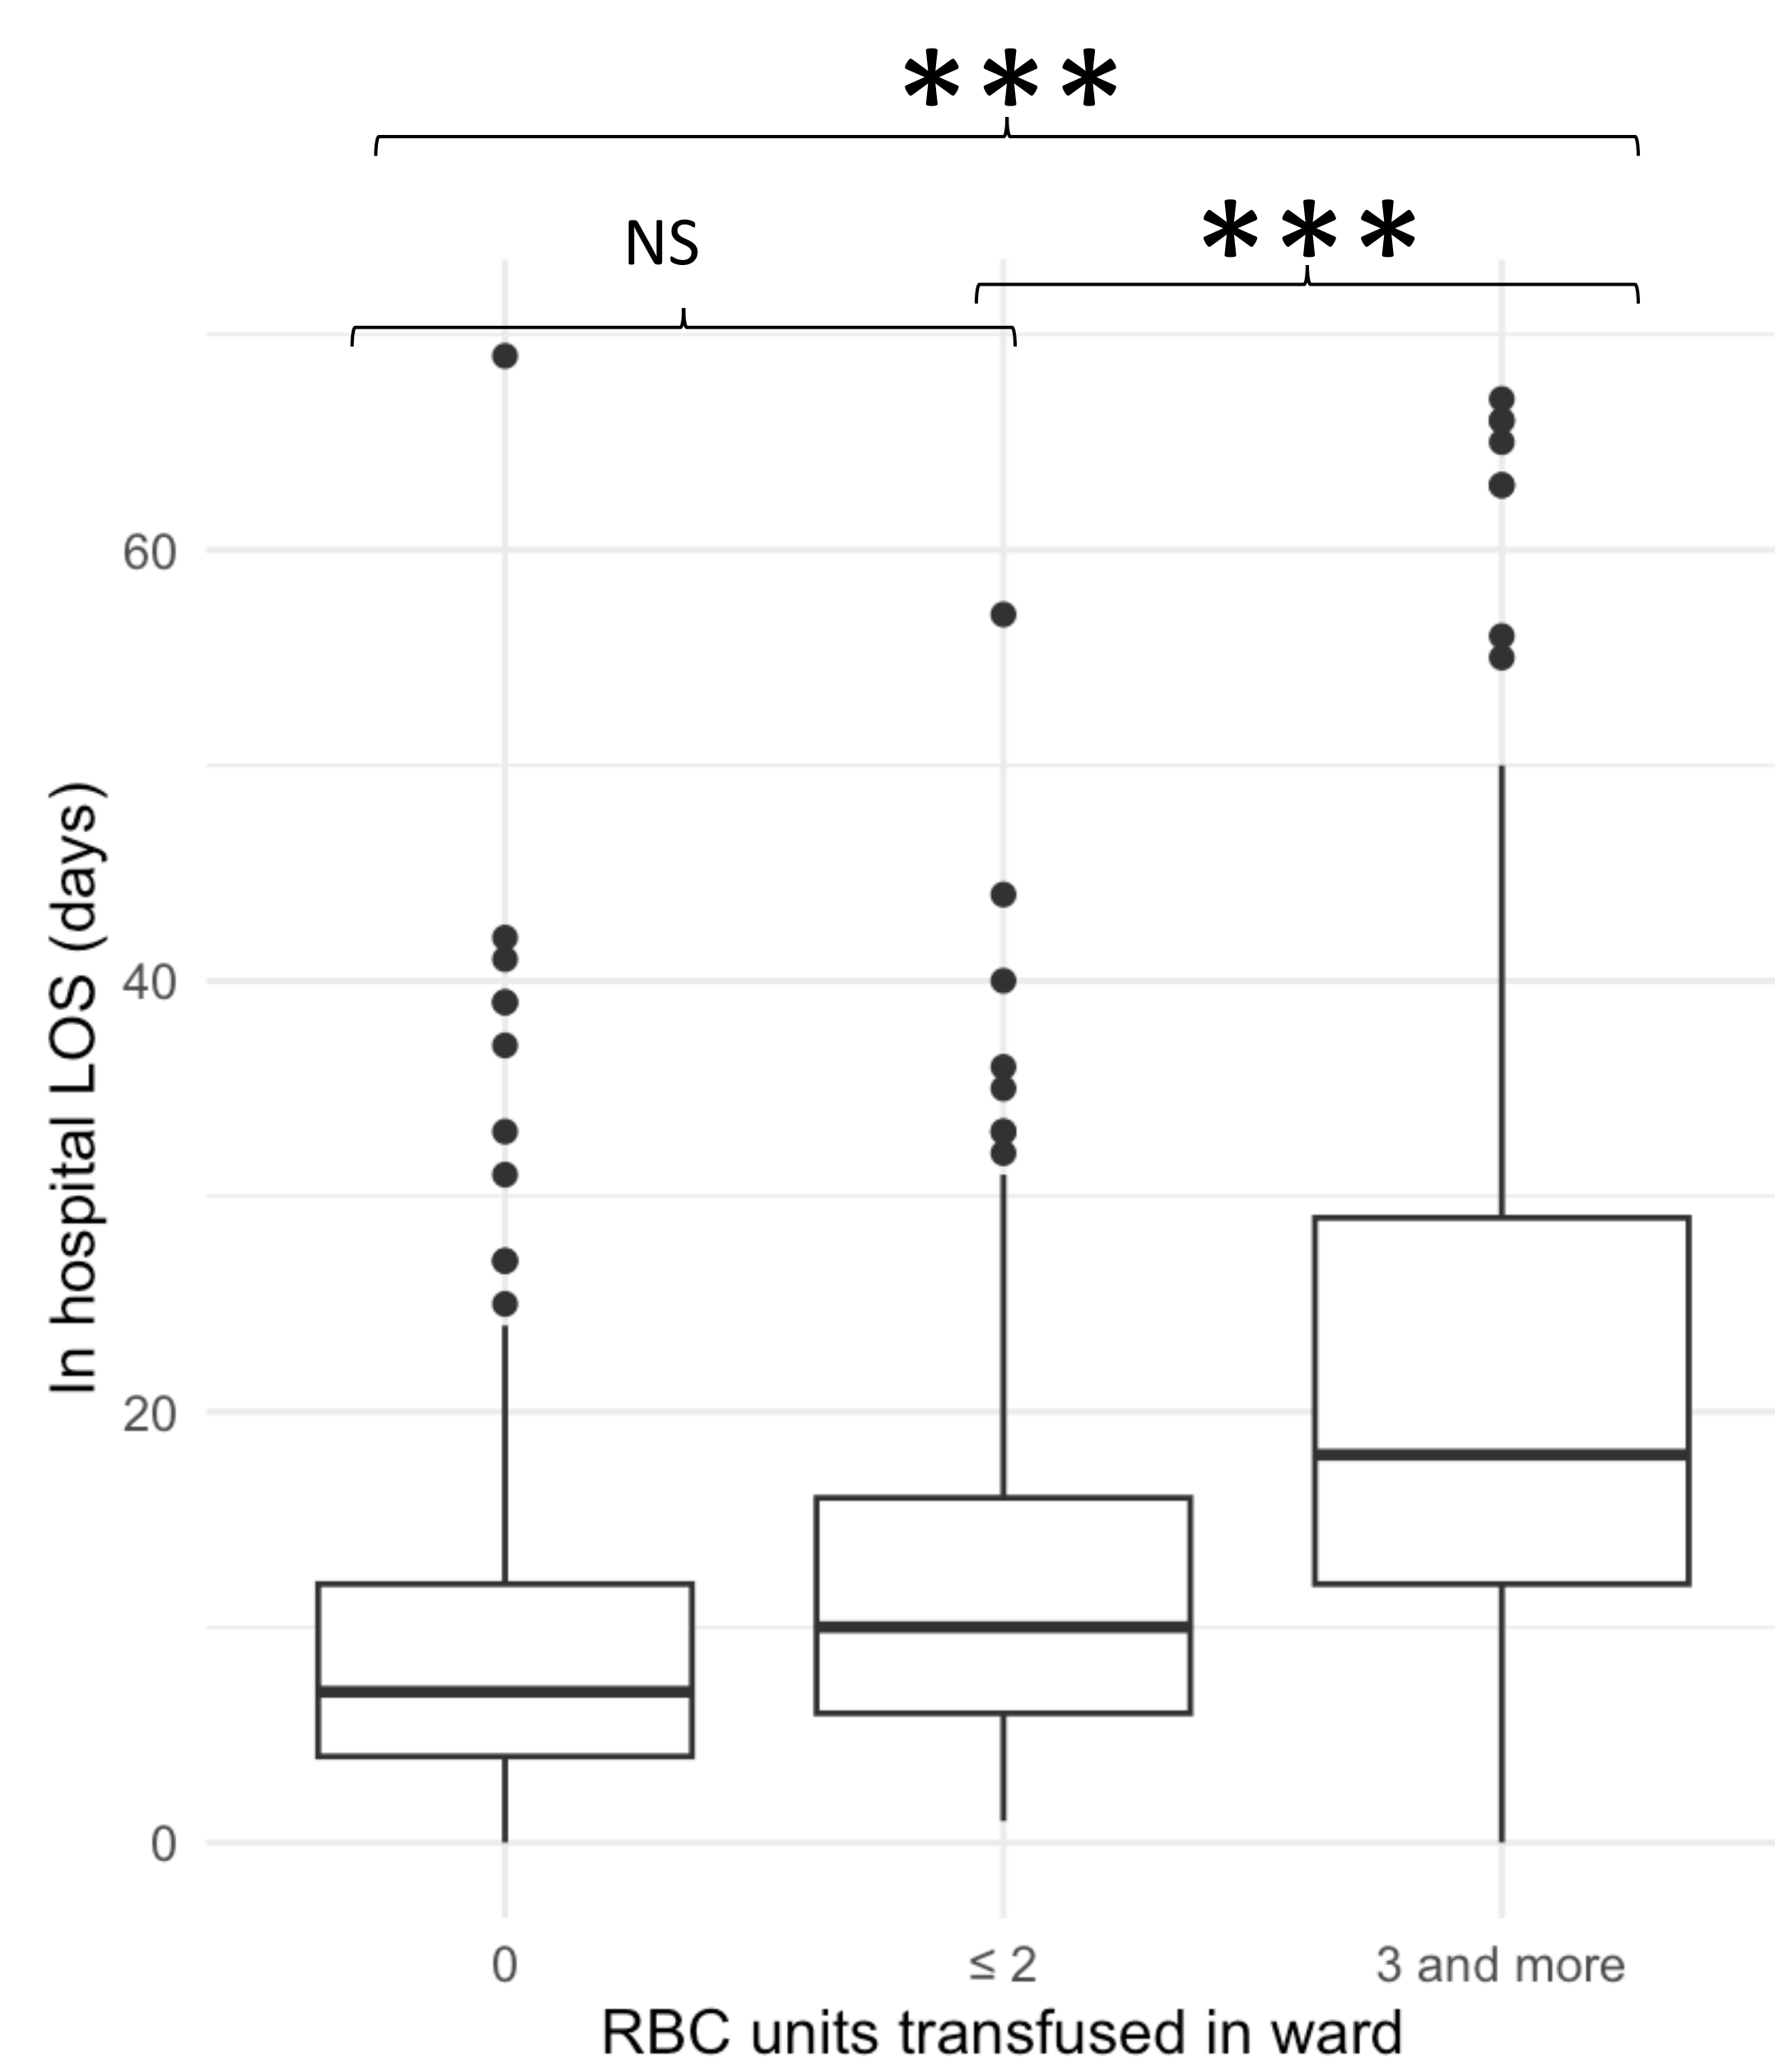

Source: https://medrxiv.org/content/10.1101/2024.09.11.24313465v1.full.pdf
